# Supplementary material for: The Effect of Ferritin on Arteriovenous Fistula Survival in Hemodialysis Patients: Analyzing Using Data Mining Technique.
Source: Research Square preprint supplement (doi:10.21203/rs.3.rs-286474/v1), 2021-03-31

**Table 1.** AVF function classification

| AVF function classification |
| --- |
| Year<1 |
| Year≥1 |

**Table 2.** Serum ferritin classification

| Ferritin classification |
| --- |
| Ferritin ≤200 |
| 200< Ferritin <500 |
| Ferritin ≥500 |

**Table 3.** Hemoglobin classification

| Hemoglobin classification |
| --- |
| HB<=8 |
| HB>8 |

**Table 4.** Classified ratio of serum iron on TIBC

| SI/TIBC classification |
| --- |
| SI/TIBC <30% |
| SI/TIBC ≥30% |

**Table 5.** Extracted rules correspond to DT1

| AVF Survival | AVF function  <1 / ≥1 | Extracted Rules | SI/TIBC |
| --- | --- | --- | --- |
|  |  | If SI/TIBC ≥0/3 and Ferritin≤200 and HB>8 = then (1/3) |  |
| 57% | 6  8 | If SI/TIBC ≥ 0.3 and 200< Ferritin <500 and HB≤8 = then (1/3) | Greater than or equal to 30% |
|  |  | If SI/TIBC ≥ 0.3 and Ferritin≥500 = then (4/2) |  |
|  |  | If SI/TIBC<0.3 and Ferritin≤200 = then (10/26) |  |
| 66% | 52  26 | If SI/TIBC<0.3 and 200< Ferritin <500 and HB>8 = then (12/15) | less than 30% |
|  |  | If SI/TIBC<0.3 and 200< Ferritin <500 and HB≤8 = then (1/1) |  |
|  |  | If SI/TIBC<0.3 and Ferritin≥500 = then (3/10) |  |

**Table 6.** Confusion matrix of DT1; accuracy rate:66.07%


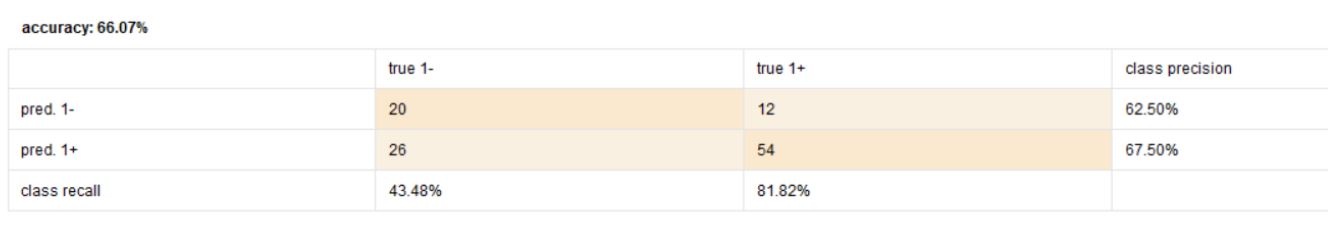


**Table 7.** Extracted rules correspond to DT2

| AVF Survival | AVF function  <1 / ≥1 | Extracted Rules | Ferritin  Classification |
| --- | --- | --- | --- |
| 70% | 31  13 | If Ferritin≤200 = then (13/31) | Ferritin≤200 |
|  |  | If 200< Ferritin <500 and HB>8 = then (17/18) | 200< Ferritin <500 |
| 46% | 26 | If 200< Ferritin <500 and HB≤8 = then (9/5) |  |
| 63% | 7  12 | If Ferritin≥500 = then (7/12) | Ferritin≥500 |

23

**Table 8.** Confusion matrix of DT2; accuracy rate: 62.50%


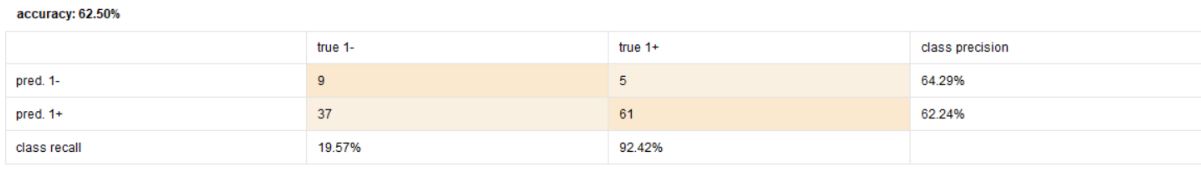


**Table 9.** Extracted rules correspond to DT3

| AVF Survival | AVF function  <1 / ≥1 | Extracted Rules | SI/TIBC |
| --- | --- | --- | --- |
|  |  | If SI/TIBC ≥ 0.3 and Ferritin>200 = then (15/9) |  |
| 56% | 18  14 | If SI/TIBC ≥ 0.3 and Ferritin≤200 and HB>8 = then (1/3) | Greater than or equal to 30% |
|  |  | If SI/TIBC ≥ 0.3 and Ferritin≤200 and HB<8 = then (2/2) |  |
| 65% | 52  28 | If SI/TIBC < 0.3 = then (28/52) | less than 30% |

**Table 10.** Confusion matrix of DT3; accuracy rate: 64.29%


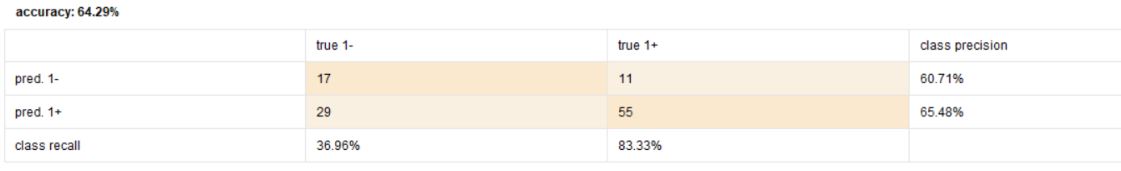


**Table 11.** Extracted rules correspond to DT4

| AVF Survival | AVF function  <1 / ≥1 | Extracted Rules | SI/TIBC |
| --- | --- | --- | --- |
| 33% | 9  18 | If SI/TIBC ≥ 0.3 and Ferritin≤200 = then (3/5) | Greater than or equal to 30% |
|  |  | If SI/TIBC ≥ 0.3 and Ferritin>200 = then (15/4) |  |
| 65% | 52  28 | If SI/TIBC < 0.3 = then (28/52) | less than 30% |

**Table 12.** Confusion matrix of DT4; accuracy rate: 64.29%


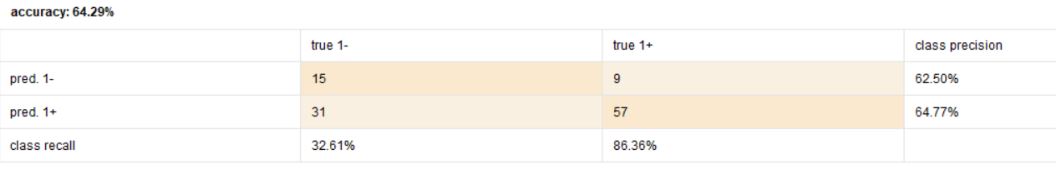

Supplement: Supplementary file 3 [file db08c2557b1e2a34c9ace80d.docx]
