# Supplementary material for: The Effect of Ferritin on Arteriovenous Fistula Survival in Hemodialysis Patients: Analyzing Using Data Mining Technique.
Source: Research Square preprint supplement (doi:10.21203/rs.3.rs-286474/v1), 2021-03-31
Supplement: Supplementary file 2 [file e107c5f9b2dad9077783a419.docx]

AVF: Arteriovenous fistula

AVG: Arteriovenous graft

CHAID: Chi-squared Automatic Interaction Detection

CV: Cardiovascular

CVC: Central venous catheter

DT: Decision tree

ESRD: End stage renal disease

HB: Hemoglobin

HD: Hemodialysis

HKC: Hasheminejad kidney center

IDA: Iron deficiency anemia

ISAT: Iron saturation

KDD: Knowledge discovery in databases

K/DOQI: Kidney disease outcome quality initiative

NKF: National kidney foundation

SI: Serum iron

TIBC: Total iron-binding capacity

VA: Vascular access
